# Supplementary material
Source: PubMed Central journal article supplement (PMC4128487)
Supplement: NIHMS614773-supplement-Supplementary_Table_1.pdf [file NIHMS614773-supplement-Supplementary_Table_1.pdf]

Supplementary Table S1. p-values for mutation patterns of established and novel SMGs among 65 hypermutated endometrial tumors

| Gene      | p-values (Fisher's Exact test §) |        |                 |        |        |        |        |               |        |        |        |        |        |        |               |        |        |        |        |        |               |                |                 |          |        |               |               |                 |                 |         |               | Reference   |             |
|-----------|----------------------------------|--------|-----------------|--------|--------|--------|--------|---------------|--------|--------|--------|--------|--------|--------|---------------|--------|--------|--------|--------|--------|---------------|----------------|-----------------|----------|--------|---------------|---------------|-----------------|-----------------|---------|---------------|-------------|-------------|
|           | PTEN                             | PIK3CA | PIK3R1          | ARID1A | RPL22  | KRAS   | ZFH3   | ARID5B        | CTCF   | CSMD3  | CTNNB1 | GIGYF2 | BCOR   | CSDE1  | FGFR2         | CCND1  | LIMCH1 | RBMX   | NKAP   | ATR    | FBXW7         | PPP2R1A        | HIST1H2BD       | TP53     | CHD4   | SPOP          | MECOM         | METTL14         | SGK1            | TNFAIP6 | SOX17         |             |             |
| PTEN      | ---                              | 0.5544 | 0.091419        | 0.3717 | 0.6283 | 0.4093 | 0.2225 | 0.4032        | 0.4032 | 0.5527 | 0.5063 | 0.5063 | 0.5921 | 0.3567 | 0.695         | 0.3274 | 0.6726 | 0.3274 | 0.2032 | 0.5607 | 0.4393        | 0.15513        | 0.49308         | 0.5069   | 0.5834 | 0.4166        | 0.33013       | 0.669872        | 0.7673          | 0.8769  | 17, 32, 33]   |             |             |
| PIK3CA    | ---                              | ---    | <b>0.000005</b> | 0.4132 | 0.2315 | 0.0517 | 0.4414 | 0.5968        | 0.5968 | 0.2819 | 0.3801 | 0.6233 | 0.612  | 0.0969 | 0.1663        | 0.4456 | 0.2701 | 0.4456 | 0.4122 | 0.4133 | 0.265         | 0.26499        | 0.229474        | 0.5742   | 0.2504 | 0.2504        | 0.55849       | 0.092949        | 0.7139          | 0.4615  | 17, 32, 33]   |             |             |
| PIK3R1    | ---                              | ---    | ---             | 0.519  | 0.3174 | 0.1845 | 0.0857 | 0.3863        | 0.6137 | 0.4804 | 0.4201 | 0.5799 | 0.276  | 0.6306 | 0.2523        | 0.5981 | 0.5981 | 0.5981 | 0.2801 | 0.5444 | 0.4556        | 0.54436        | 0.069705        | 0.6714   | 0.1719 | 0.5276        | 0.6503        | 0.349702        | 0.6438          | 0.4     | 17, 32, 33]   |             |             |
| ARID1A    | ---                              | ---    | ---             | ---    | 0.1912 | 0.0536 | 0.4706 | 0.4966        | 0.5034 | 0.5876 | 0.3221 | 0.5694 | 0.6246 | 0.2005 | 0.2768        | 0.3278 | 0.1258 | 0.3278 | 0.4844 | 0.2722 | 0.6106        | 0.61057        | 0.615022        | 0.385    | 0.4725 | 0.1383        | 0.24405       | 0.694597        | 0.6058          | 0.6308  | 17, 32, 33]   |             |             |
| RPL22     | ---                              | ---    | ---             | ---    | ---    | 0.2926 | 0.5294 | 0.276         | 0.4966 | 0.1481 | 0.5694 | 0.4306 | 0.3754 | 0.5453 | 0.5615        | 0.1146 | 0.1258 | 0.3278 | 0.2212 | 0.3894 | 0.6106        | 0.12822        | <b>0.005146</b> | 0.615    | 0.5275 | <b>0.0157</b> | 0.6946        | 0.694597        | 0.3942          | 0.6308  | 17, 32, 33]   |             |             |
| KRAS      | ---                              | ---    | ---             | ---    | ---    | ---    | 0.5977 | 0.5535        | 0.1319 | 0.0564 | 0.2417 | 0.276  | 0.5978 | 0.2323 | <b>0.0139</b> | 0.4093 | 0.5907 | 0.5907 | 0.4788 | 0.0635 | 0.3568        | 0.64322        | 0.585338        | 0.5853   | 0.5553 | 0.1653        | 0.26282       | 0.262821        | 0.5861          | 0.6462  | 17, 32, 33]   |             |             |
| ZFH3      | ---                              | ---    | ---             | ---    | ---    | ---    | ---    | <b>0.0354</b> | 0.4799 | 0.1163 | 0.3601 | 0.1566 | 0.5453 | 0.3654 | 0.5677        | 0.1949 | 0.2225 | 0.5291 | 0.3674 | 0.2628 | 0.3944        | 0.60556        | 0.164909        | 0.5087   | 0.0829 | 0.3608        | 0.67514       | 0.221841        | 0.476           | 0.3077  | 17, 32, 33]   |             |             |
| ARID5B    | ---                              | ---    | ---             | ---    | ---    | ---    | ---    | ---           | 0.2294 | 0.5903 | 0.344  | 0.6286 | 0.4922 | 0.5822 | 0.6584        | 0.5968 | 0.5968 | 0.2662 | 0.5141 | 0.4228 | 0.5772        | 0.19238        | 0.076106        | 0.3253   | 0.3402 | 0.6598        | 0.44872       | 0.448718        | 0.5889          | 0.7692  | 17, 32, 33]   |             |             |
| CTCF      | ---                              | ---    | ---             | ---    | ---    | ---    | ---    | ---           | ---    | 0.4097 | 0.6286 | 0.3714 | 0.4922 | 0.4178 | <b>0.025</b>  | 0.2662 | 0.5968 | 0.4032 | 0.1946 | 0.1924 | 0.5772        | 0.19238        | 0.256512        | 0.6747   | 0.6598 | 0.6598        | 0.44872       | 0.448718        | 0.5889          | 0.7692  | 17, 32, 33]   |             |             |
| CSMD3     | ---                              | ---    | ---             | ---    | ---    | ---    | ---    | ---           | ---    | ---    | 0.103  | 0.4283 | 0.1787 | 0.367  | 0.2964        | 0.5527 | 0.4473 | 0.4473 | 0.4715 | 0.3838 | 0.6162        | 0.61619        | 0.707959        | 0.292    | 0.6309 | 0.6309        | 0.11458       | 0.523237        | 0.613           | 0.2154  | 17, 32, 33]   |             |             |
| CTNNB1    | ---                              | ---    | ---             | ---    | ---    | ---    | ---    | ---           | ---    | ---    | ---    | 0.2355 | 0.3821 | 0.1028 | 0.5789        | 0.4937 | 0.4937 | 0.5063 | 0.4277 | 0.0888 | 0.2465        | 0.34448        | 0.259265        | 0.2593   | 0.6001 | 0.3999        | 0.49405       | 0.494048        | 0.6375          | 0.2     | 17, 32, 33]   |             |             |
| GIGYF2    | ---                              | ---    | ---             | ---    | ---    | ---    | ---    | ---           | ---    | ---    | ---    | ---    | 0.6179 | 0.6445 | 0.5789        | 0.1491 | 0.4937 | 0.1917 | 0.1365 | 0.3445 | 0.6555        | 0.34448        | 0.259265        | 0.3146   | 0.6001 | 0.6001        | 0.49405       | 0.494048        | 0.3625          | 0.2     | 17, 32, 33]   |             |             |
| BCOR      | ---                              | ---    | ---             | ---    | ---    | ---    | ---    | ---           | ---    | ---    | ---    | ---    | ---    | 0.4605 | 0.4756        | 0.5921 | 0.1265 | 0.2061 | 0.0877 | 0.2662 | 0.2662        | <b>0.00603</b> | 0.382876        | 0.3829   | 0.5329 | 0.5329        | 0.07177       | 0.432143        | 0.688           | 0.1692  | 17, 32, 33]   |             |             |
| CSDE1     | ---                              | ---    | ---             | ---    | ---    | ---    | ---    | ---           | ---    | ---    | ---    | ---    | ---    | ---    | 0.1345        | 0.6433 | 0.6433 | 0.6433 | 0.2921 | 0.2279 | 0.649         | 0.64903        | 0.165932        | 0.1659   | 0.1088 | 0.5037        | 0.39938       | 0.059409        | 0.7139          | 0.1538  | 17, 32, 33]   |             |             |
| FGFR2     | ---                              | ---    | ---             | ---    | ---    | ---    | ---    | ---           | ---    | ---    | ---    | ---    | ---    | ---    | ---           | 0.305  | 0.695  | 0.695  | 0.2471 | 0.6069 | 0.3931        | 0.19071        | 0.462454        | 0.5375   | 0.089  | 0.4575        | 0.36539       | <b>0.048077</b> | 0.7404          | 0.1385  | 17, 32, 33]   |             |             |
| CCND1     | ---                              | ---    | ---             | ---    | ---    | ---    | ---    | ---           | ---    | ---    | ---    | ---    | ---    | ---    | ---           | ---    | 0.3274 | 0.2536 | 0.2032 | 0.5607 | 0.4393        | 0.56067        | 0.110498        | 0.4931   | 0.4166 | <b>0.0048</b> | 0.66987       | 0.330128        | 0.7673          | 0.8769  | 17, 32, 33]   |             |             |
| LIMCH1    | ---                              | ---    | ---             | ---    | ---    | ---    | ---    | ---           | ---    | ---    | ---    | ---    | ---    | ---    | ---           | ---    | ---    | 0.6726 | 0.3798 | 0.5607 | <b>0.0212</b> | 0.56067        | 0.50692         | 0.5069   | 0.5834 | 0.5834        | 0.33013       | 0.330128        | 0.2327          | 0.8769  | 17, 32, 33]   |             |             |
| RBMX      | ---                              | ---    | ---             | ---    | ---    | ---    | ---    | ---           | ---    | ---    | ---    | ---    | ---    | ---    | ---           | ---    | ---    | ---    | 0.3798 | 0.5607 | 0.5607        | 0.43933        | 0.110498        | 0.1105   | 0.5834 | 0.4166        | 0.66987       | 0.669872        | <b>0.0135</b>   | 0.8769  | 17, 32, 33]   |             |             |
| NKAP      | ---                              | ---    | ---             | ---    | ---    | ---    | ---    | ---           | ---    | ---    | ---    | ---    | ---    | ---    | ---           | ---    | ---    | ---    | ---    | ---    | 0.51          | 0.49           | 0.12166         | 0.554743 | 0.4453 | 0.3733        | 0.0543        | 0.29359         | 0.29359         | 0.7947  | 0.1077        | 17, 32, 33] |             |
| ATR       | ---                              | ---    | ---             | ---    | ---    | ---    | ---    | ---           | ---    | ---    | ---    | ---    | ---    | ---    | ---           | ---    | ---    | ---    | ---    | ---    | ---           | 0.4545         | 0.09084         | 0.393892 | 0.3939 | 0.3278        | 0.6722        | <b>0.00046</b>  | 0.255746        | 0.8226  | 0.0923        | 17, 32, 33] |             |
| FBXW7     | ---                              | ---    | ---             | ---    | ---    | ---    | ---    | ---           | ---    | ---    | ---    | ---    | ---    | ---    | ---           | ---    | ---    | ---    | ---    | ---    | ---           | ---            | 0.5455          | 0.606108 | 0.6061 | 0.6722        | 0.6722        | 0.25575         | 0.744254        | 0.1774  | 0.9077        | 17, 32, 33] |             |
| PPP2R1A   | ---                              | ---    | ---             | ---    | ---    | ---    | ---    | ---           | ---    | ---    | ---    | ---    | ---    | ---    | ---           | ---    | ---    | ---    | ---    | ---    | ---           | ---            | ---             | 0.606108 | 0.6061 | 0.3278        | <b>0.0397</b> | <b>0.02072</b>  | <b>0.020719</b> | 0.8226  | 0.0923        | 17, 32, 33] |             |
| HIST1H2BD | ---                              | ---    | ---             | ---    | ---    | ---    | ---    | ---           | ---    | ---    | ---    | ---    | ---    | ---    | ---           | ---    | ---    | ---    | ---    | ---    | ---           | ---            | ---             | ---      | 0.3388 | 0.7202        | 0.2798        | 0.78343         | 0.783425        | 0.851   | 0.9231        | 17, 32, 33] |             |
| TP53      | ---                              | ---    | ---             | ---    | ---    | ---    | ---    | ---           | ---    | ---    | ---    | ---    | ---    | ---    | ---           | ---    | ---    | ---    | ---    | ---    | ---           | ---            | ---             | ---      | ---    | 0.7202        | 0.7202        | 0.78343         | 0.783425        | 0.149   | 0.9231        | 17, 32, 33] |             |
| CHD4      | ---                              | ---    | ---             | ---    | ---    | ---    | ---    | ---           | ---    | ---    | ---    | ---    | ---    | ---    | ---           | ---    | ---    | ---    | ---    | ---    | ---           | ---            | ---             | ---      | ---    | 0.7708        | 0.17605       | 0.176053        | 0.8798          | 0.0615  | 17, 32, 33]   |             |             |
| SPOP      | ---                              | ---    | ---             | ---    | ---    | ---    | ---    | ---           | ---    | ---    | ---    | ---    | ---    | ---    | ---           | ---    | ---    | ---    | ---    | ---    | ---           | ---            | ---             | ---      | ---    | ---           | ---           | 0.82395         | 0.176053        | 0.8798  | <b>0.9385</b> | 17, 32, 33] |             |
| MECOM     | ---                              | ---    | ---             | ---    | ---    | ---    | ---    | ---           | ---    | ---    | ---    | ---    | ---    | ---    | ---           | ---    | ---    | ---    | ---    | ---    | ---           | ---            | ---             | ---      | ---    | ---           | ---           | ---             | 0.134158        | 0.9091  | <b>0.0462</b> | 17, 32, 33] |             |
| METTL14   | ---                              | ---    | ---             | ---    | ---    | ---    | ---    | ---           | ---    | ---    | ---    | ---    | ---    | ---    | ---           | ---    | ---    | ---    | ---    | ---    | ---           | ---            | ---             | ---      | ---    | ---           | ---           | ---             | ---             | 0.9091  | <b>0.0462</b> | 17, 32, 33] |             |
| SGK1      | ---                              | ---    | ---             | ---    | ---    | ---    | ---    | ---           | ---    | ---    | ---    | ---    | ---    | ---    | ---           | ---    | ---    | ---    | ---    | ---    | ---           | ---            | ---             | ---      | ---    | ---           | ---           | ---             | ---             | 0.9692  | 17, 32, 33]   |             |             |
| TNFAIP6   | ---                              | ---    | ---             | ---    | ---    | ---    | ---    | ---           | ---    | ---    | ---    | ---    | ---    | ---    | ---           | ---    | ---    | ---    | ---    | ---    | ---           | ---            | ---             | ---      | ---    | ---           | ---           | ---             | ---             | ---     | ---           | 17, 32, 33] |             |
| SOX17     | ---                              | ---    | ---             | ---    | ---    | ---    | ---    | ---           | ---    | ---    | ---    | ---    | ---    | ---    | ---           | ---    | ---    | ---    | ---    | ---    | ---           | ---            | ---             | ---      | ---    | ---           | ---           | ---             | ---             | ---     | ---           | ---         | 17, 32, 33] |

(§) p-values <0.05, as derived via Fisher's Exact test are shown in bold text; p-values are not adjusted for FDR [32, 33]

Statistically significant (§) trend towards co-occurrence of mutations

Statistically significant (§) trend towards mutual exclusivity of mutations

No events recorded for one or both genes
